# Supplementary material for: Catalase-like pleated niobium carbide MXene loaded with polythiophene for oxygenated sonodynamic therapy in solid tumor
Source: Royal Society of Chemistry journal article supplement (doi:10.1039/d3nr03731b), 2023-01-01
Supplement: d3nr03731b1.pdf [file d3nr03731b1.pdf]

## **Catalase-like pleated niobium carbide MXene loaded with polythiophene for oxygenated sonodynamic therapy in solid tumor**

E Pang,<sup>†, a</sup> Baoling Li,<sup>†, a</sup> Chuanling Zhou,<sup>†, a</sup> Shaojing Zhao,<sup>a</sup> Yu Tang,<sup>b, c</sup> Qiuxia Tan,<sup>a</sup> Chaoyi Yao,<sup>a</sup> Benhua Wang,<sup>a</sup> Kai Han,<sup>\*, a</sup> Xiangzhi Song,<sup>a</sup> Zheyu Hu,<sup>b, c</sup> Quchang Ouyang,<sup>\*, b, c</sup> Shiguang Jin,<sup>\*, d</sup> Minhuan Lan<sup>\*, a</sup>

<sup>a</sup>. Key Laboratory of Hunan Province for Water Environment and Agriculture Product Safety, College of Chemistry and Chemical Engineering, Central South University, Changsha, 410083, P. R. China. E-mail: minhuanlan@csu.edu.cn, kaihan@csu.edu.cn

<sup>b</sup>. Medical Department of Breast Cancer, the Aflited Cancer Hospital of Xiangya School of Medicine, Central South University, Changsha, P. R. China. E-mail: oyqc1969@126.com

<sup>c</sup>. Medical Department of Breast Cancer, Hunan Cancer Hospital, No. 283, Tongzipo Road, Changsha, Hunan, 410013, P. R. China.

<sup>d</sup>. Center for Translational Medicine, The Affiliated Taizhou People's Hospital of Nanjing Medical University, Taizhou School of Clinical Medicine, Nanjing Medical University, Taizhou, Jiangsu, 225300, P. R. China. E-mail: jinshiguang20230419@njmu.edu.cn

## **EXPERIMENTAL SECTION**

### **Materials and Instrutments**

Poly(vinylpyrrolidone) (PVP) and 3-(4,5-Dimethylthiazol-2-yl)-2,5-diphenyltetrazolium bromide (MTT) were purchased from Sigma-Aldrich Trading Co., Ltd. 9,10-Anthracenediyl-bis(methylene)dimalonic Acid (ABDA) was purchased from Shanghai Aladdin Biochemical Technology Co., Ltd. Dihydrorhodamine 123 (DHR123) was purchased from Dalian Meilun Biotech Co., Ltd. 2',7'-Dichlorodihydrofluorescein diacetate (DCFH-DA), calcein-AM, and propidium iodide (PI) is purchased from Heowns Biochem Technologies, LLC, Tianjin. The hydrogen peroxide kit was purchased from Beijing Solarbio Science & Technology Co., Ltd. The EdU kit was purchased from Shanghai Bioscience Co., Ltd.

The UV-vis-NIR absorption and fluorescence spectra were recorded on Shimadzu UV2600 and RF6000 spectrophotometers, respectively. Scanning electron microscope (SEM) images were obtained from JSM-7610F, JEOL Ltd. Fluorescence imaging of the cells was performed under an inverted fluorescence microscope (Leica DMIL LED). MTT cell viability experiments were performed on an enzyme-labeled instrument (Varioskan LUX). The Zeta potential experiment was obtained on Particle Size and zeta potential Analyzer (Zetasizer Nano ZS). Animal fluorescence imaging was obtained on a multifunctional imaging analysis system (Perkin Elmer, IVIS Lumina III). The dissolved oxygen test was obtained on dissolved oxygen analyzer (Rex Electric, JPBj-609L). The ultrasonic treatment of mice was performed under an ultrasonic therapy equipment (Welld, WED-100).

### **Synthesis of PT2**

The synthesis of PT2 is described in the previous work of our group [Ref: *J. Am. Chem. Soc.*, 2012, **134**, 6685-6694].

### **Preparation of Nb<sub>2</sub>C-PVP-PT2 nanosheets**

Nb<sub>2</sub>C was prepared according to our previous work. Two milliliters of aqueous Nb<sub>2</sub>C (1 mg/mL) and 10 mL of aqueous PVP (1 mg/mL) were mixed and stirred at room temperature for 6 h. After 2 mL of PT2 in methanol (1 mg/mL) was added dropwise, the mixture was stirred overnight. After 12 h, methanol was removed by centrifugation (9000 rpm), and the precipitate was dissolved in water to obtain Nb<sub>2</sub>C-PVP-PT2 nanosheets, which were stored in a refrigerator (4 °C).

### **Calculation of PT2 load efficiency**

The loading capacity (*LC*, w/w%) of PT2 is calculated using the following equation:

$$LC = \frac{\text{Weight of loaded PT2}}{\text{Weight of Nb}_2\text{C nanosheets}}$$

The standard curves for PT2 and Nb<sub>2</sub>C were calculated according to FigureS2.

### **Determination of oxygen content *in vitro***

First, the anaerobic state of a dissolved oxygen electrode was calibrated in a newly prepared sodium sulfite solution, and the full oxygen state was then calibrated in air. After calibration, the electrode was placed in a 50 mL centrifuge tube filled

with 9 mL of water until the reading was stable, and 1 mL of hydrogen peroxide solution (1 mM) was then added to water. After 10 min, 1 mL of Nb<sub>2</sub>C solution (1 mg/mL) was added to the solution, and the amount of oxygen in the mixture was recorded.

#### **Determination of <sup>1</sup>O<sub>2</sub> and O<sub>2</sub><sup>•-</sup> in aqueous solution**

<sup>1</sup>O<sub>2</sub> generated by Nb<sub>2</sub>C-PVP-PT2 under ultrasonic conditions was detected using ABDA sodium salt (ABDA-Na). ABDA-Na (50 μL) was added into Nb<sub>2</sub>C-PVP-PT2 aqueous solution (2 mL, 200 μg/mL), and the mixture was then irradiated with ultrasound using an ultrasonic therapy instrument (1.0 MHz, 1.5 W/cm<sup>2</sup>) for 5 cycles, each for 2 min. The UV-vis-NIR absorption spectra of <sup>1</sup>O<sub>2</sub> captured by ADBA was measured.

Commercial DHR123 was used to assay the O<sub>2</sub><sup>•-</sup> generation capability of Nb<sub>2</sub>C-PVP-PT2. The assay was conducted by first adding 5 μL of DHR123 probe to 2 mL of Nb<sub>2</sub>C-PVP-PT2 (200 μg/mL). The fluorescence spectra of the mixture were then scanned every 2 min under ultrasound irradiation (λ<sub>ex</sub>=500 nm). The O<sub>2</sub><sup>•-</sup> generation capability of H<sub>2</sub>O was determined using the same procedure described above.

#### **Determination of intracellular ROS**

4T1 cells were divided into four groups (PBS, PBS + US, Nb<sub>2</sub>C-PVP-PT2, and Nb<sub>2</sub>C-PVP-PT2 + US). The cells in each group were first incubated in a 37 °C cell incubator for 24 h. Subsequently, the medium used to culture cells in PBS and US groups was replaced with a new 1640 culture medium, while that used to culture cells in the Nb<sub>2</sub>C-PVP-PT2 and Nb<sub>2</sub>C-PVP-PT2 + US groups was replaced with 1640 culture medium containing Nb<sub>2</sub>C-PVP-PT2. After incubation for 4 h, DCFH-DA was added, and the incubation was continued for additional 30 min. After that, all cells were washed three times with PBS, and cells in the US and Nb<sub>2</sub>C-PVP-PT2 + US groups were treated with ultrasonic therapeutic apparatus (1.0 MHz, 1.5W /cm<sup>2</sup>). Finally, cells in all groups were imaged using an inverted fluorescence microscope.

#### **Determination of intracellular H<sub>2</sub>O<sub>2</sub>**

4T1 cells were uniformly inoculated in 24-well plates. When the cell growth reached 80-90%, the cells were divided into two groups, namely non-Nb<sub>2</sub>C and Nb<sub>2</sub>C.

Each well was added with 500  $\mu$ L medium or 400  $\mu$ L medium mixed with Nb<sub>2</sub>C. 4 h later, the cells were collected into the centrifuge tube and the supernatant was discarded. Then 2 mL acetone solution was added to the two groups of cells and treated with ultrasonic cell disruptor (power 20%, ultrasonic 3 s, 10 s interval, repeat 30 times). After the ultrasound, centrifuge at 4 °C at 8000 r for 10 minutes, take the supernatant liquid ice to be measured, and prepare the sample to be measured according to the proportion. Finally, the prepared samples were transferred to 96-well plates, and the prepared reagents were used as blank group to eliminate errors, and tested under the enzyme label instrument.

### **MTT cell experiment**

The 4T1 cells were evenly planted in 96-well plates and cultured at 37 °C for 24 h in a cell incubator containing 5% CO<sub>2</sub>. The 1640 culture group containing different concentrations of Nb<sub>2</sub>C-PVP-PT2 was replaced for further incubation. The cells in the ultrasound group were incubated for 4 h, and ultrasonic therapy instrument was used for ultrasound (1.0 MHz, 1.5 W/cm<sup>2</sup>, 10 min). After 24 h, the medium was discarded and 200  $\mu$ L cell medium containing MTT (10%) was added to each well. After 4 h, the medium was discarded and 200  $\mu$ L DMSO was added to each well. After 10 min, DMSO was tested under an enzyme-labeled instrument.

### **AM/PI staining**

The 4T1 cells were divided into four groups, *i.e.* PBS, PBS + US, Nb<sub>2</sub>C-PVP-PT2, Nb<sub>2</sub>C-PVP-PT2 + US groups, and evenly grown in 96-well plates. After 24 hours of incubation in the cell incubator, the Nb<sub>2</sub>C-PVP-PT2 and Nb<sub>2</sub>C-PVP-PT2 + US groups were replaced with fresh 1640 medium containing Nb<sub>2</sub>C-PVP-PT2 (200  $\mu$ g/mL), and the PBS and PBS + US groups were replaced with a mixture of PBS and 1640 medium and incubation continued for 4 hours. The cells in each group were then stained with calcein-AM (2  $\mu$ M, 10  $\mu$ L)-PI solution (2  $\mu$ M, 10  $\mu$ L) for 10 min (calcein-AM shows green fluorescence for live cells; PI stains for dead cells, showing red fluorescence). Subsequently, ultrasound treatment (1.0 MHz, 1.5 W/cm<sup>2</sup>, 5 min) was performed on the US group and the Nb<sub>2</sub>C-PVP-PT2 + US group using an ultrasonic therapy instrument. After washing three times with PBS, the staining of the

cells in each group was observed with a fluorescent inverted microscope.

### **EdU staining of proliferating cells**

4T1 cells divided into 4 groups described above were inoculated into confocal dishes for 24 h, and each group was treated accordingly. 4 h later, the cells in laser groups were exposed to ultrasound ( $1.5 \text{ W/cm}^2$ ) for 5 min. The cells were then incubated with a mixture of  $10 \text{ }\mu\text{M}$  EdU and culture medium for 1 h. After incubation was complete, the medium was removed and  $50 \text{ }\mu\text{L}$  of 4% paraformaldehyde fixative was added and incubated for 15 min. The fixative was then removed after incubation was complete. Next,  $50 \text{ }\mu\text{L}$  of glycine ( $2 \text{ mg/mL}$ ) was added to each group of cells and incubated for 5 min to neutralize any residual fixative. Then  $100 \text{ }\mu\text{L}$  of 0.5% Triton X-100 was added and incubated for 20 min.

For preparing Click-iT working solution,  $860 \text{ }\mu\text{L}$  of Click-iT EdU reaction buffer,  $40 \text{ }\mu\text{L}$  of copper sulfate and  $2 \text{ }\mu\text{L}$  of Azide-488 were mixed.  $100 \text{ }\mu\text{L}$  of Click-iT working solution was added to each well and incubated for 30 min at room temperature. The cells were washed twice with PBS before adding  $100 \text{ }\mu\text{L}$  of Hoechst 33342 solution and subsequent incubation for 30 min. Finally, cells were washed three times with PBS and imaged with a confocal scanning microscope.

### ***In Vivo* Fluorescence Imaging**

$200 \text{ }\mu\text{L}$  of  $\text{Nb}_2\text{C-PVP-PT2}$  ( $200 \text{ }\mu\text{g/mL}$ ) in aqueous solution was administered to mice by intratumor injection. After Half an hour later, images were obtained in the multifunctional imaging analysis system ( $\text{Ex}=440 \text{ nm}$ ).

### **Animal Model**

Animal experiments were performed under the approval of the ethics committee of Hunan Normal University (No. 430727221100498257). Balb/c female mice (8 weeks) were purchased from Hunan SJA Laboratory Animal Co., Ltd. To establish a mouse tumour model, we evenly grew 8 boxes of 4T1 cells in a  $90 \text{ mm}^2$  culture dish. When the cells grew to 80-90%, the cells were digested and centrifuged,  $2 \text{ mL}$  of culture medium was added and blown well with a pipette, and the 4T1 cells were injected under the skin of the back of two mice ( $1\text{mL}/\text{each}$ ). After about 2 weeks, when the tumour grew to  $800 \text{ mm}^3$ , the tumour was peeled and divided into  $2 \text{ mm} \times 2$

mm size and transplanted to the subcutaneous dorsal surface of healthy mice. After about 10 days, the tumours grew to 80mm<sup>3</sup> size and the mouse experiment was started.

Mice were randomly divided into 4 groups, and Nb<sub>2</sub>C-PVP-PT2 group and Nb<sub>2</sub>C-PVP-PT2 + US group were injected intratumorally with Nb<sub>2</sub>C-PVP-PT2 solution (200 µg/mL, 200µL). After waiting for 10 minutes, coupling agent was spread on the ultrasound probe and then ultrasound treatment (1.0 MHz, 1.5 W/cm<sup>2</sup> for 10 minutes) was applied to the tumours of mice requiring ultrasound treatment. Changes in tumour growth and weight changes in mice were then recorded over the next 14 days.

### H&E and Ki67 section experiments

Four 4T1 tumour-bearing mice were treated with PBS, PBS + US Nb<sub>2</sub>C-PVP-PT2, Nb<sub>2</sub>C-PVP-PT2 + US (200 µL, 200 µg/mL of Nb<sub>2</sub>C-PVP-PT2 or 200 µL of PBS) and then immediately peeled of tumour tissue and fixed with 4% paraformaldehyde. Next H&E and Ki67 stained sections were performed at Wuhan Sevier Biotechnology Co. Ltd.

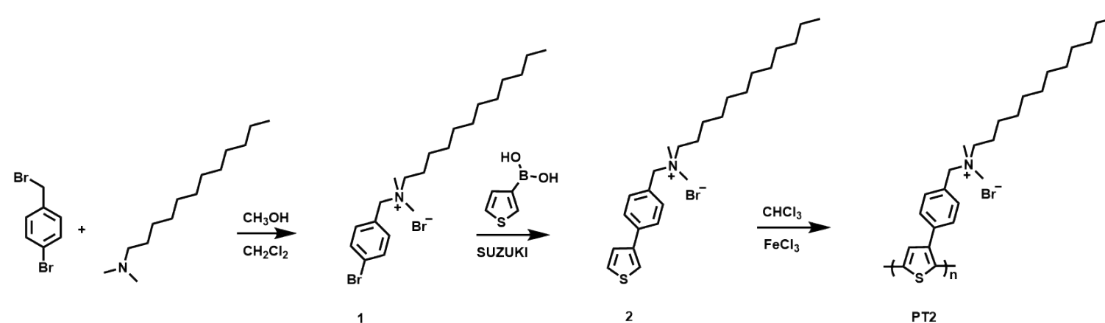

**Figure S1** Synthetic route of PT2.

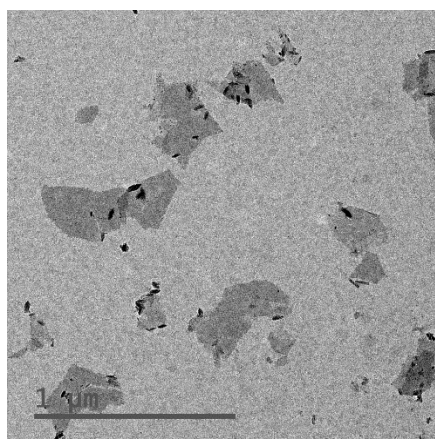

**Figure S2** TEM image of Nb<sub>2</sub>C MXene.

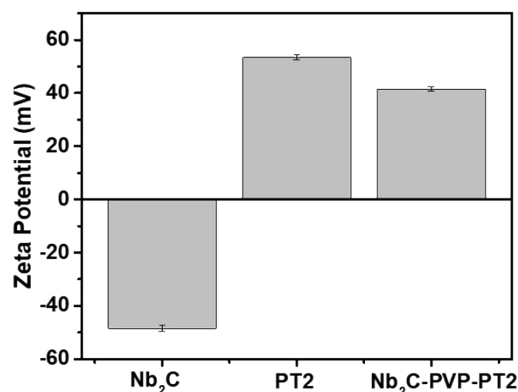

**Figure S3** The Zeta potential of Nb<sub>2</sub>C MXene, PT2 and Nb<sub>2</sub>C-PVP-PT2 NSs aqueous solutions.

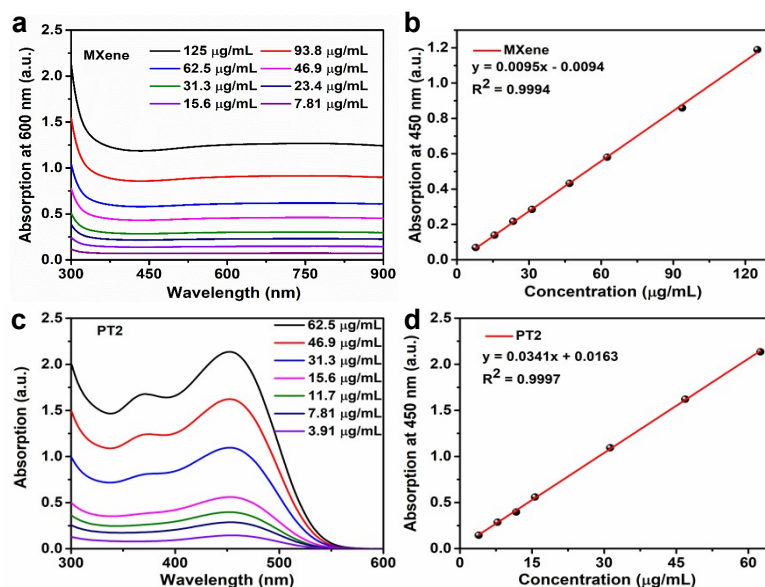

**Figure S4** Standard curves of (A, B) MXene and (C, D) PT2, and its linearity plots.

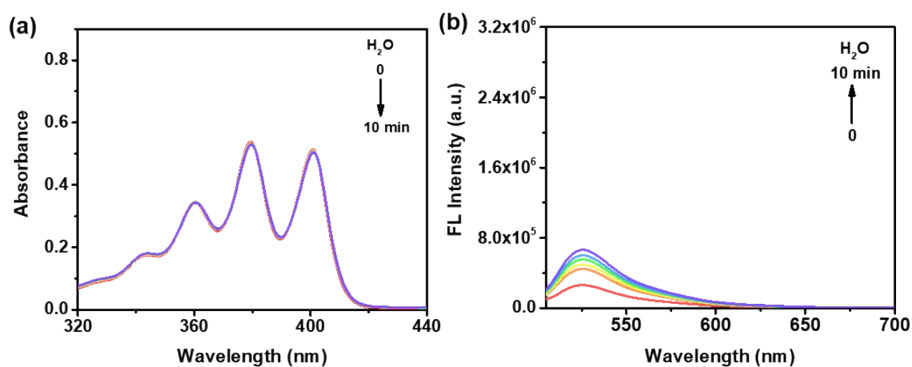

**Figure S5** US irradiation time-dependent (a) UV-vis absorption spectra of ABDA, and (b) fluorescence spectra of DHR 123 ( $\lambda_{\text{ex}}$ =500 nm) in the absence of Nb<sub>2</sub>C-PVP-PT2 NSs.

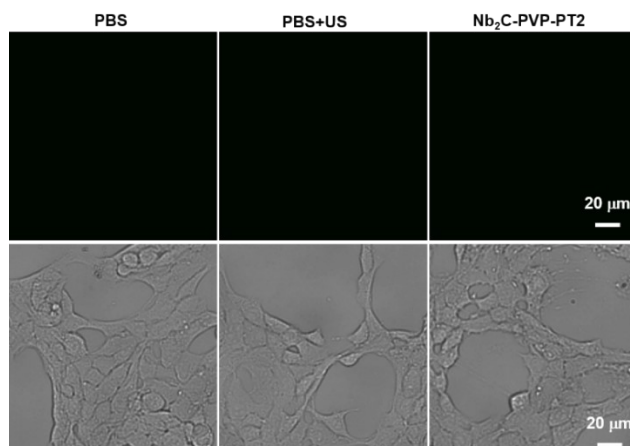

**Figure S6** Images of 4T1 cells from different treatment groups after incubation with O22 probe. (1.0 MHz, 1.5 W/cm<sup>2</sup>, 10 min)

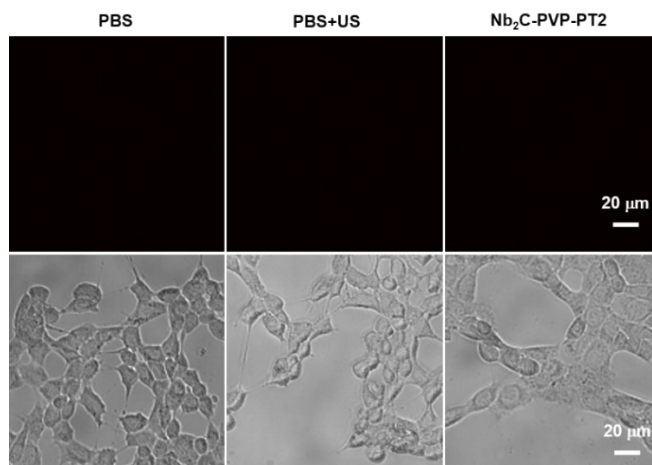

**Figure S7** Images of 4T1 cells from different treatment groups after incubation with DHE probe. (1.0 MHz, 1.5 W/cm<sup>2</sup>, 10 min).
